# Supplementary material for: Galanin 2 Receptor: A Novel Target for a Subset of Pancreatic Ductal Adenocarcinoma
Source: MDPI journal article supplement (doi:10.3390/ijms241210193), 2023-06-15
Supplement: s1 [file s1]

## SUPPLEMENTARY DATA

### Galanin 2 receptor: a novel target in a subset of pancreatic ductal adenocarcinoma

Pawel Namsolleck, Barbara Kofler, Gert N. Moll

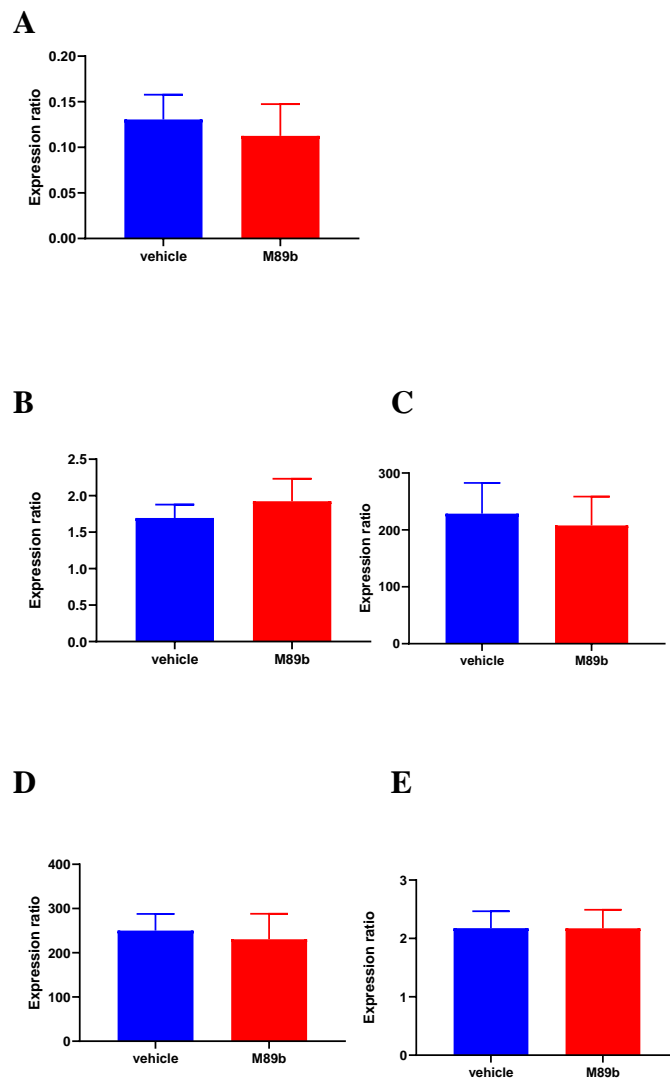

**Figure S1. Relative expression of markers after treatment with vehicle or M89b.**

Treatment of mice with M89b had no effect on expression of *Bcl2* (A), *MKI67* (B), *Bax* (C), *TOP2A* (D) and *TP53* (E) in Panc11074 PDX tissue. Data are presented  $\pm$  SEM, (n=9).

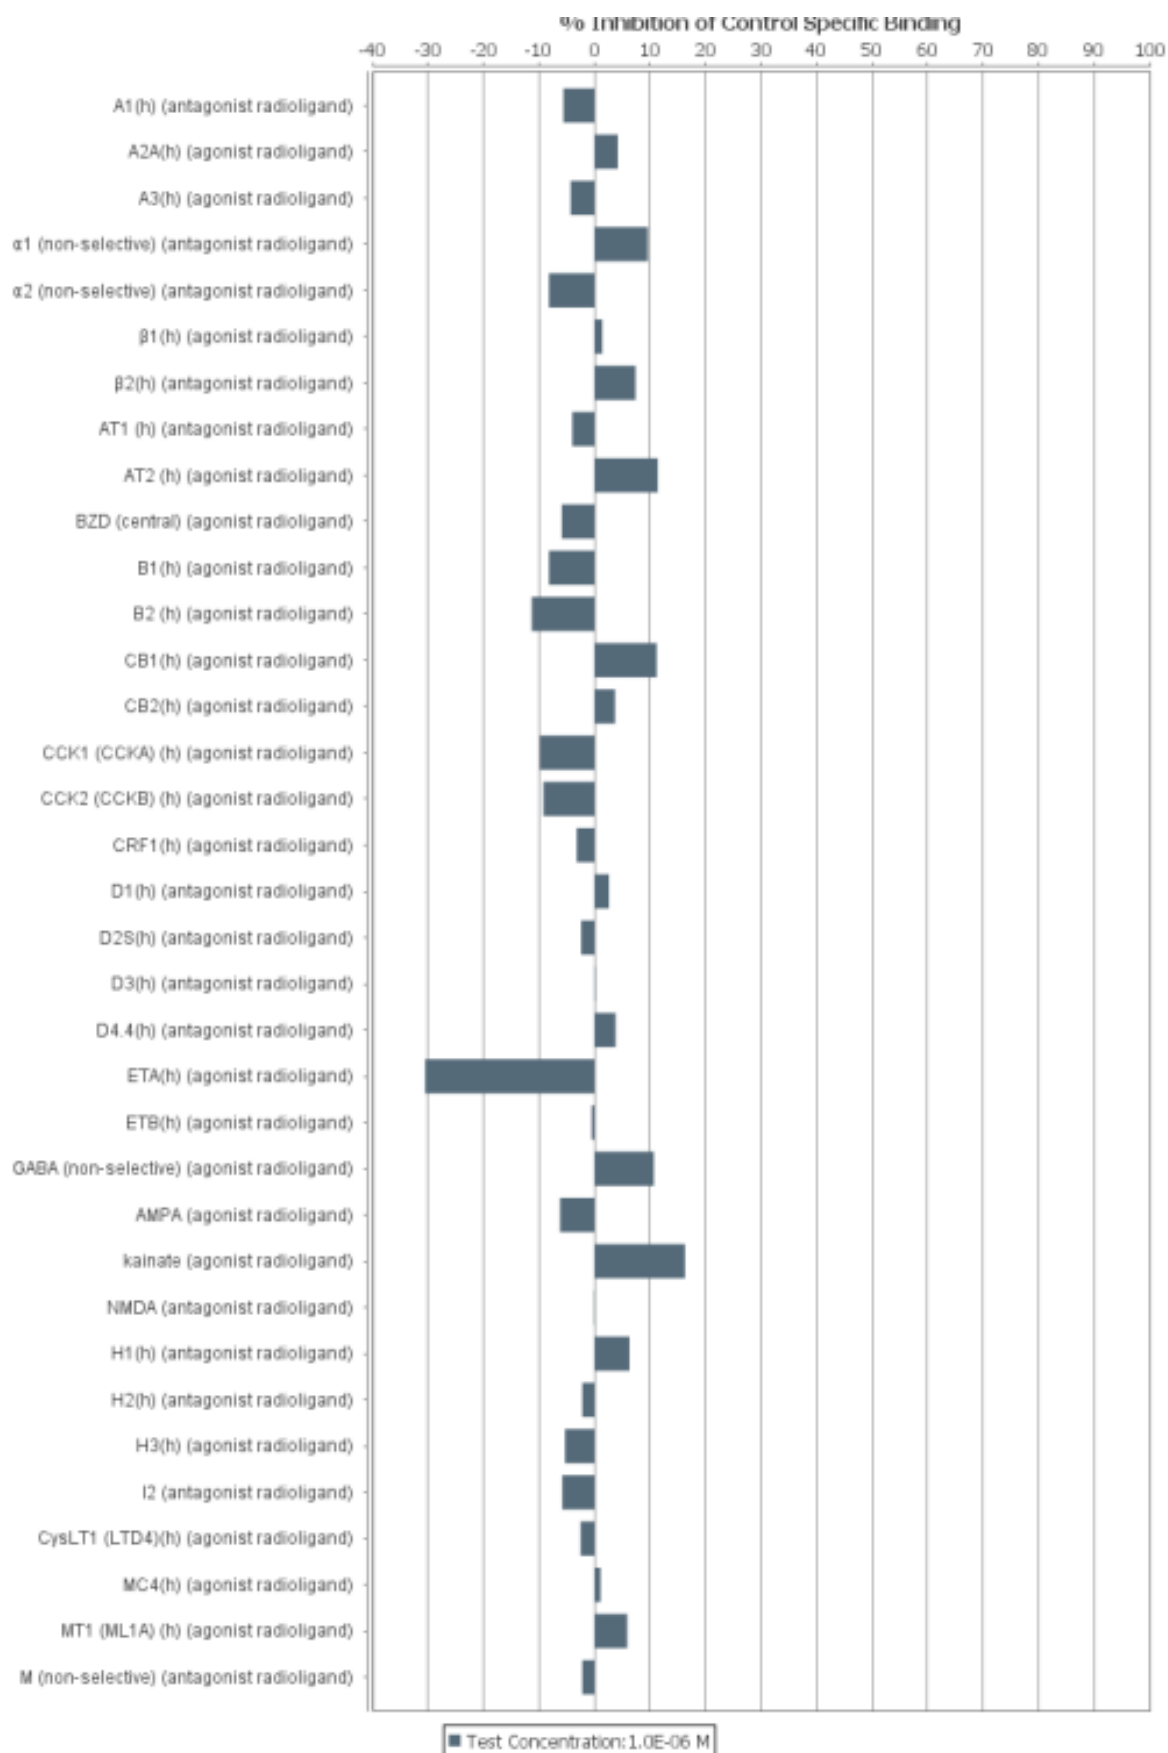

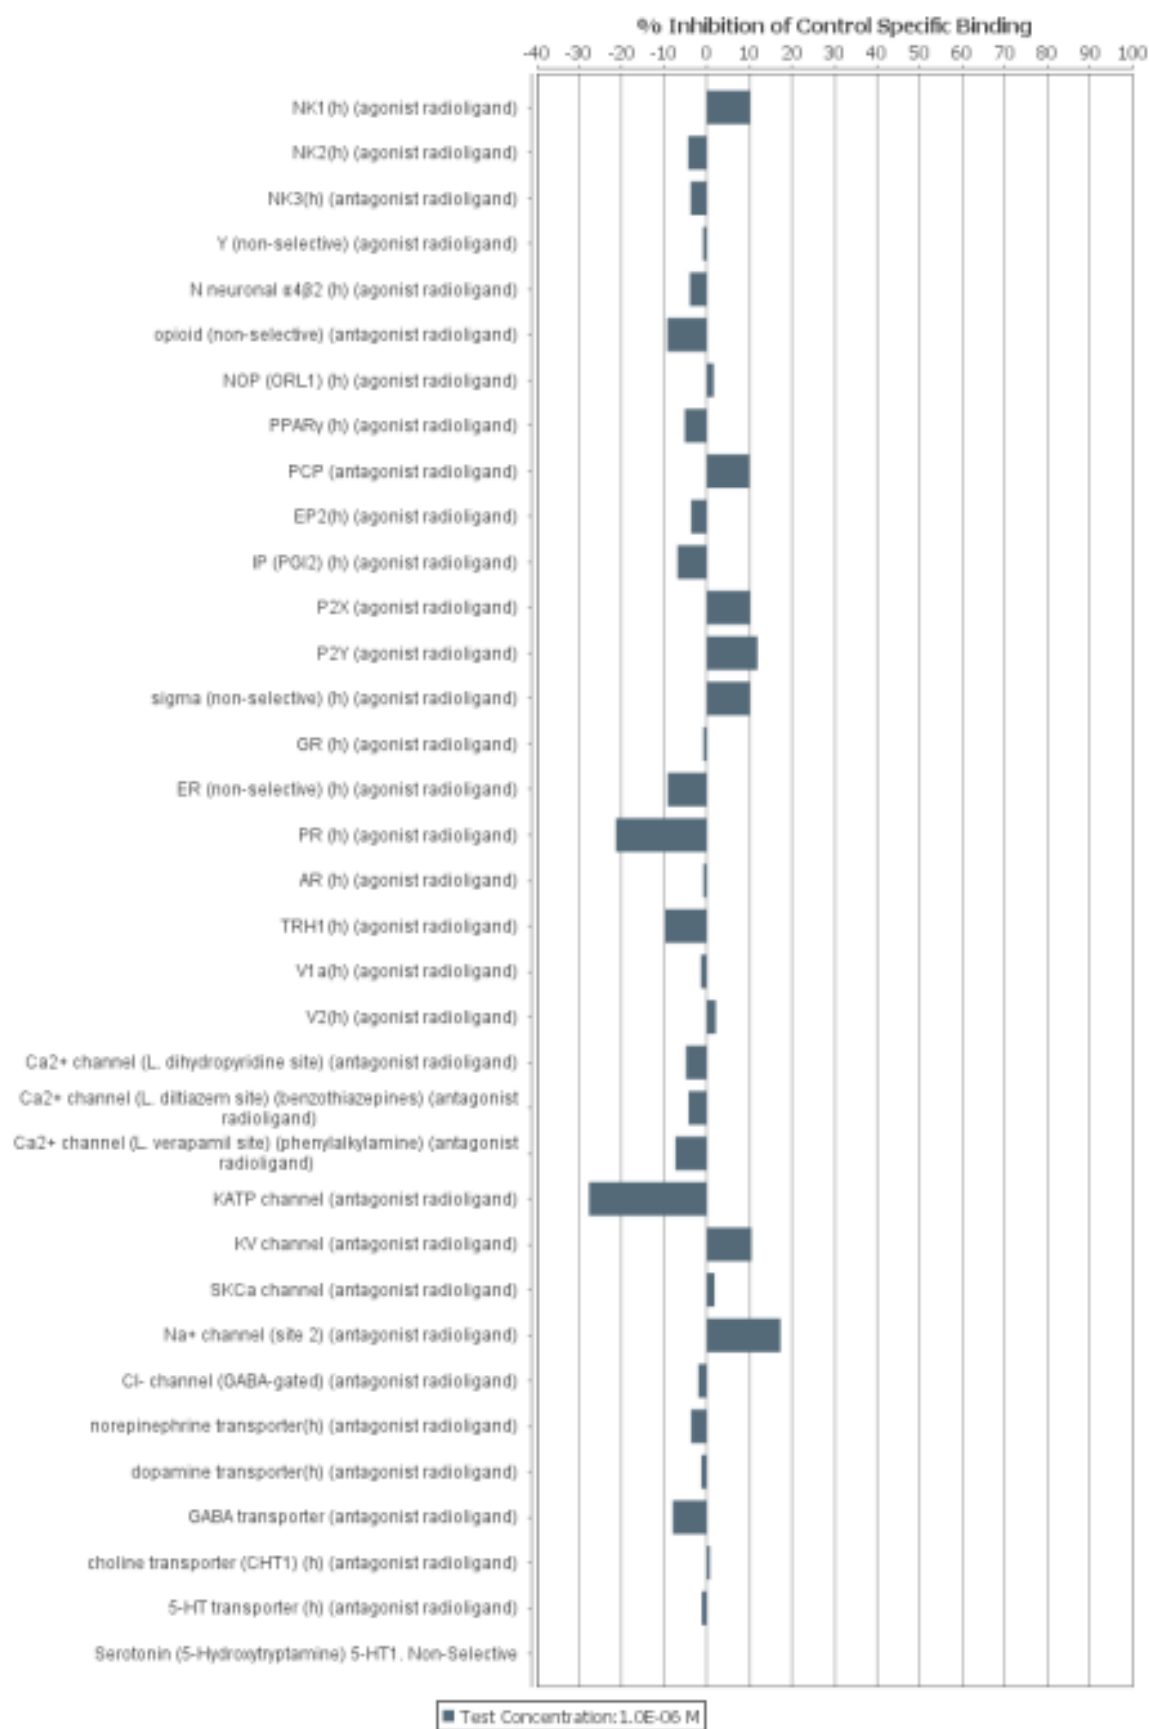

**Figure S2. Target binding at 1  $\mu$ M M89b in a multi-target safety panel.**

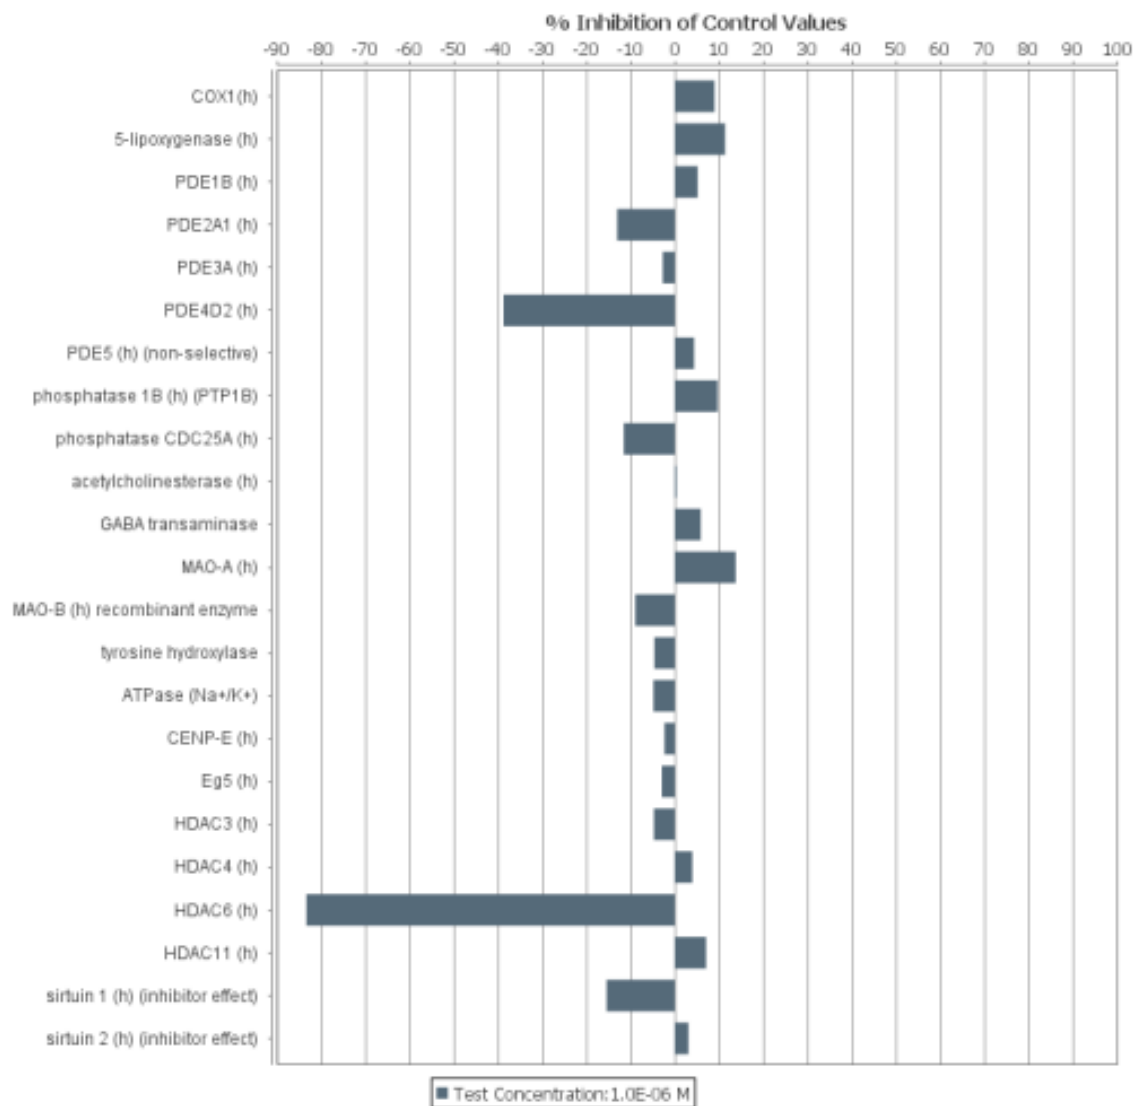

**Figure S3. Enzyme and uptake assays at 1  $\mu$ M M89b.**

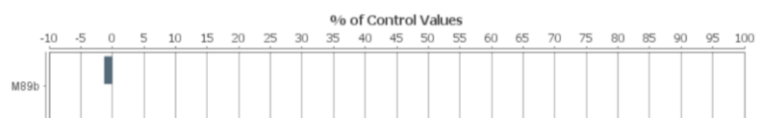

**Figure S4. Activator effect of M89b on adenylyl cyclase.**

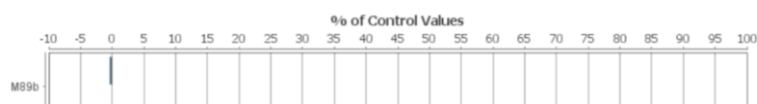

**Figure S5. Activator effect of M89b on guanylyl cyclase.**

**A**

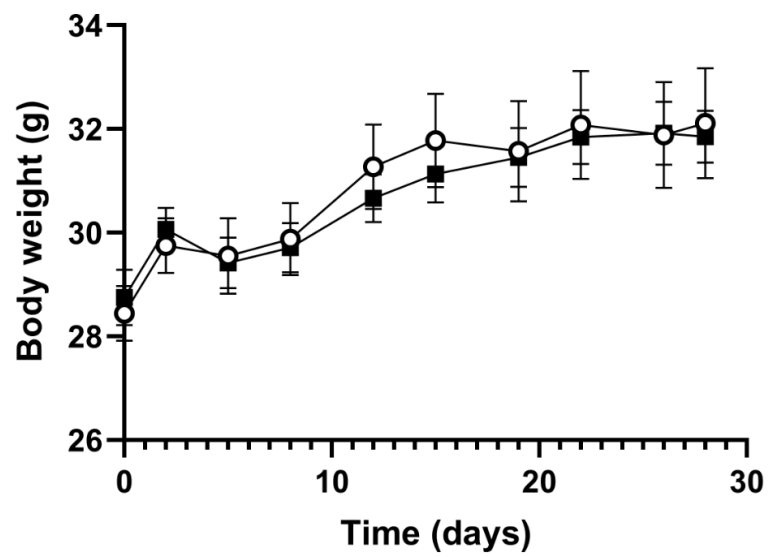

**B**

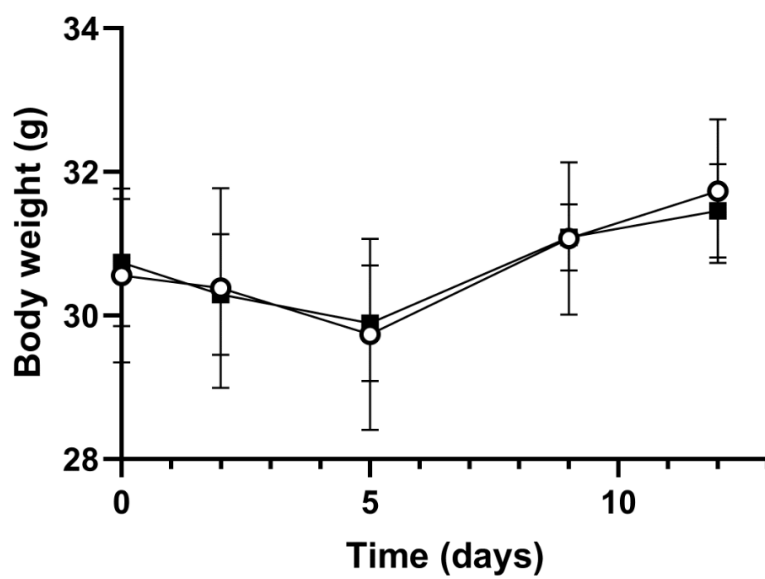

C

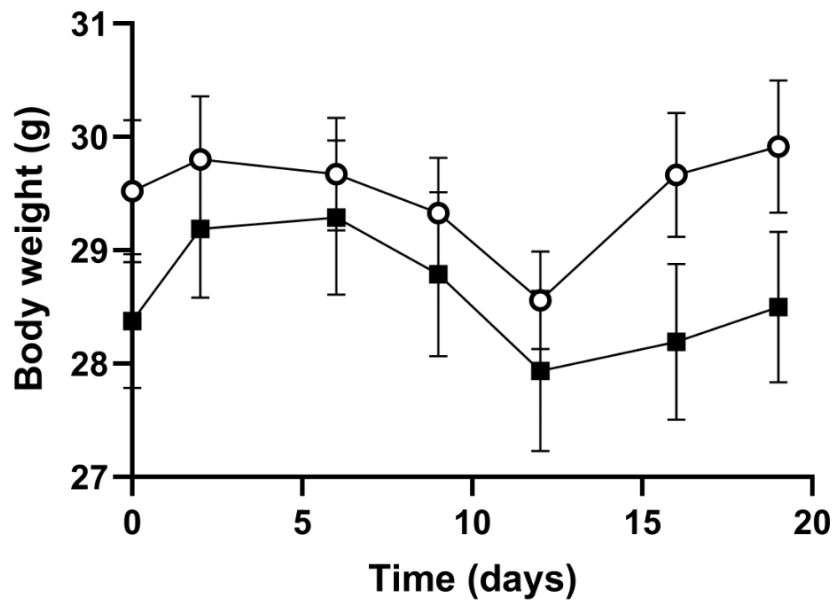

D

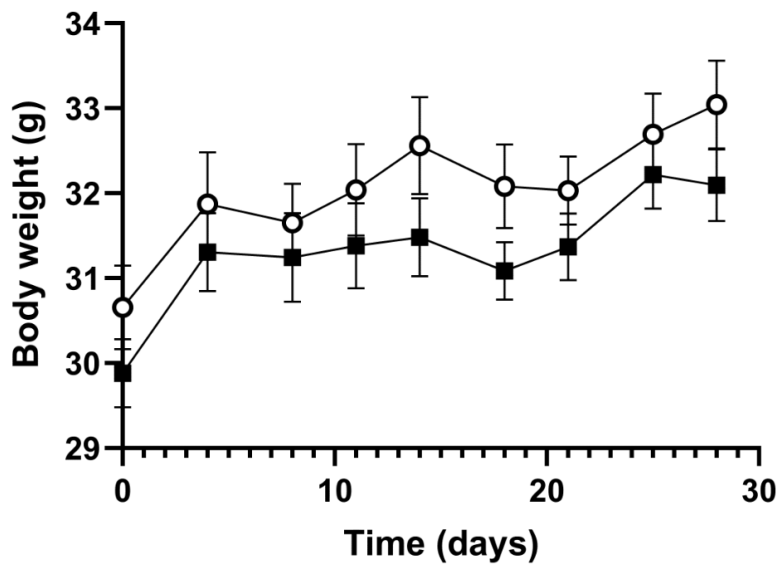

**Figure S6ABCD.** Effect of M89b treatment on body weight of mice with PDX xenografts (A):

Panc11074, (B): Panc11056, (C): Panc11495, (D): Panc9759 (n=5-9 in each group).

| <b>Table S1. Probes.</b> |                   |
|--------------------------|-------------------|
| <b>Probe</b>             | <b>Lot Nr</b>     |
| GalR2 Hs00605839_m1      | 1672852 + 1439439 |
| MKI67 Hs01032433_m1      | 1782541           |
| PCNA Hs00427214_g1       | P200316-008-H07   |
| RacGAP1 Hs01100049_mH    | 1713072           |
| TOP2A Hs01032137_m1      | P200312-009-H08   |
| BCL2 Hs01048932_g1       | P200918-007-H01   |
| TP53 Hs01034249_m1       | 1769968           |
| Bax Hs00180269_m1        | P200312-009-H10   |
| MMP13 Hs00942584_m1      | 1759123           |

**Table S2. *In vitro* target binding conditions.**

| Assay                                                                 | Source                            | Ligand                                                         | Conc.   | Kd      | Non Specific                                       | Incubation   | Detection Method       | Bibl. |
|-----------------------------------------------------------------------|-----------------------------------|----------------------------------------------------------------|---------|---------|----------------------------------------------------|--------------|------------------------|-------|
| <b>Receptors</b>                                                      |                                   |                                                                |         |         |                                                    |              |                        |       |
| <b>A<sub>1</sub> (h)</b><br>(antagonist radioligand)                  | human recombinant (CHO cells)     | [ <sup>3</sup> H]DPCPX                                         | 1 nM    | 1.7 nM  | DPCPX (1 μM)                                       | 60 min RT    | Scintillation counting | 245   |
| <b>A<sub>2A</sub> (h)</b><br>(agonist radioligand)                    | human recombinant (HEK-293 cells) | [ <sup>3</sup> H]CGS 21680                                     | 6 nM    | 27 nM   | NECA (10 μM)                                       | 120 min RT   | Scintillation counting | 141   |
| <b>A<sub>3</sub> (h)</b><br>(agonist radioligand)                     | human recombinant (HEK-293 cells) | [ <sup>125</sup> I]AB-MECA                                     | 0.15 nM | 0.22 nM | IB-MECA (1 μM)                                     | 120 min RT   | Scintillation counting | 206   |
| <b>α<sub>1</sub> (non-selective)</b><br>(antagonist radioligand)      | rat cerebral cortex               | [ <sup>3</sup> H]prazosin                                      | 0.25 nM | 0.09 nM | prazosin (0.5 μM)                                  | 60 min RT    | Scintillation counting | 88    |
| <b>α<sub>2</sub> (non-selective)</b><br>(antagonist radioligand)      | rat cerebral cortex               | [ <sup>3</sup> H]RX 821002                                     | 1 nM    | 0.66 nM | (-)-epinephrine (100 μM)                           | 60 min RT    | Scintillation counting | 249   |
| <b>β<sub>1</sub> (h)</b><br>(agonist radioligand)                     | human recombinant (HEK-293 cells) | [ <sup>3</sup> H](+)-CGP 12177                                 | 0.3 nM  | 0.39 nM | alprenolol (50 μM)                                 | 60 min RT    | Scintillation counting | 548   |
| <b>β<sub>2</sub> (h)</b><br>(antagonist radioligand)                  | human recombinant (CHO cells)     | [ <sup>3</sup> H](+)-CGP 12177                                 | 0.3 nM  | 0.15 nM | alprenolol (50 μM)                                 | 120 min RT   | Scintillation counting | 794   |
| <b>AT<sub>1</sub> (h)</b><br>(antagonist radioligand)                 | human recombinant (HEK-293 cells) | [ <sup>125</sup> I][Sar <sup>1</sup> ,Ile <sup>8</sup> ]-AT-II | 0.05 nM | 0.05 nM | angiotensin-II (10 μM)                             | 120 min 37°C | Scintillation counting | 776   |
| <b>AT<sub>2</sub> (h)</b><br>(agonist radioligand)                    | human recombinant (HEK-293 cells) | [ <sup>125</sup> I]CGP 42112A                                  | 0.01 nM | 0.01 nM | angiotensin-II (1 μM)                              | 4 hr 37°C    | Scintillation counting | 248   |
| <b>B<sub>1</sub> (h)</b><br>(agonist radioligand)                     | human recombinant (CHO cells)     | [ <sup>3</sup> H]desArg <sup>10</sup> -KD                      | 2 nM    | 2 nM    | desArg <sup>9</sup> [Leu <sup>8</sup> ]-BK (10 μM) | 120 min RT   | Scintillation counting | 525   |
| <b>B<sub>2</sub> (h)</b><br>(agonist radioligand)                     | human recombinant (CHO cells)     | [ <sup>3</sup> H]bradykinin                                    | 0.3 nM  | 0.32 nM | bradykinin (1 μM)                                  | 60 min RT    | Scintillation counting | 346   |
| <b>CB<sub>1</sub> (h)</b><br>(agonist radioligand)                    | human recombinant (CHO cells)     | [ <sup>3</sup> H]CP 55940                                      | 0.5 nM  | 3.5 nM  | WIN 55212-2 (10 μM)                                | 120 min 37°C | Scintillation counting | 657   |
| <b>CB<sub>2</sub> (h)</b><br>(agonist radioligand)                    | human recombinant (CHO cells)     | [ <sup>3</sup> H]WIN 55212-2                                   | 0.8 nM  | 1.5 nM  | WIN 55212-2 (5 μM)                                 | 120 min 37°C | Scintillation counting | 165   |
| <b>CCK<sub>1</sub> (CCK<sub>A</sub>) (h)</b><br>(agonist radioligand) | human recombinant (CHO cells)     | [ <sup>125</sup> I]CCK-8s                                      | 0.08 nM | 0.24 nM | CCK-8s (1 μM)                                      | 60 min RT    | Scintillation counting | 562   |



**Table S2. Target binding conditions - continued**

| Assay                                                                  | Source                            | Ligand                                        | Conc.    | Kd       | Non Specific                                                     | Incubation   | Detection Method       | Bibl. |
|------------------------------------------------------------------------|-----------------------------------|-----------------------------------------------|----------|----------|------------------------------------------------------------------|--------------|------------------------|-------|
| CCK <sub>2</sub> (CCK <sub>B</sub> )<br>(h)<br>(agonist radioligand)   | human recombinant (CHO cells)     | [ <sup>125</sup> I]CCK-8s                     | 0.08 nM  | 0.054 nM | CCK-8s (1 μM)                                                    | 60 min RT    | Scintillation counting | 134   |
| CRF <sub>1</sub> (h)<br>(agonist radioligand)                          | human recombinant (CHO cells)     | [ <sup>125</sup> I]sauvagine                  | 0.075 nM | 0.12 nM  | sauvagine (0.5 μM)                                               | 120 min RT   | Scintillation counting | 557   |
| D <sub>1</sub> (h)<br>(antagonist radioligand)                         | human recombinant (CHO cells)     | [ <sup>3</sup> H]SCH 23390                    | 0.3 nM   | 0.2 nM   | SCH 23390 (1 μM)                                                 | 60 min RT    | Scintillation counting | 281   |
| D <sub>2S</sub> (h)<br>(antagonist radioligand)                        | human recombinant (HEK-293 cells) | [ <sup>3</sup> H]methyl-spiperone             | 0.3 nM   | 0.15 nM  | (+)-butadamol (10 μM)                                            | 60 min RT    | Scintillation counting | 87    |
| D <sub>3</sub> (h)<br>(antagonist radioligand)                         | human recombinant (CHO cells)     | [ <sup>3</sup> H]methyl-spiperone             | 0.3 nM   | 0.085 nM | (+)-butadamol (10 μM)                                            | 60 min RT    | Scintillation counting | 145   |
| D <sub>4.4</sub> (h)<br>(antagonist radioligand)                       | human recombinant (CHO cells)     | [ <sup>3</sup> H]methyl-spiperone             | 0.3 nM   | 0.19 nM  | (+)-butadamol (10 μM)                                            | 60 min RT    | Scintillation counting | 252   |
| ET <sub>A</sub> (h)<br>(agonist radioligand)                           | human recombinant (CHO cells)     | [ <sup>125</sup> I]endothelin -1              | 0.03 nM  | 0.03 nM  | endothelin-1 (100 nM)                                            | 120 min 37°C | Scintillation counting | 30    |
| ET <sub>B</sub> (h)<br>(agonist radioligand)                           | human recombinant (CHO cells)     | [ <sup>125</sup> I]endothelin -1              | 0.03 nM  | 0.04 nM  | endothelin-1 (0.1 μM)                                            | 120 min 37°C | Scintillation counting | 541   |
| GABA<br>(non-selective)<br>(agonist radioligand)                       | rat cerebral cortex               | [ <sup>3</sup> H]GABA                         | 10 nM    | 15 nM    | GABA (100 μM)                                                    | 60 min RT    | Scintillation counting | 247   |
| H <sub>1</sub> (h)<br>(antagonist radioligand)                         | human recombinant (HEK-293 cells) | [ <sup>3</sup> H]pyrilamine                   | 1 nM     | 1.7 nM   | pyrilamine (1 μM)                                                | 60 min RT    | Scintillation counting | 492   |
| H <sub>2</sub> (h)<br>(antagonist radioligand)                         | human recombinant (CHO cells)     | [ <sup>125</sup> I]APT                        | 0.075 nM | 2.9 nM   | tiotidine (100 μM)                                               | 120 min RT   | Scintillation counting | 540   |
| H <sub>3</sub> (h)<br>(agonist radioligand)                            | human recombinant (CHO cells)     | [ <sup>3</sup> H]N <sup>2</sup> -Me-histamine | 1 nM     | 0.32 nM  | (R)-α-Me-histamine (1 μM)                                        | 60 min RT    | Scintillation counting | 563   |
| I <sub>2</sub><br>(antagonist radioligand)                             | rat cerebral cortex               | [ <sup>3</sup> H]dazoxan (+ 1 μM yohimbine)   | 2 nM     | 4 nM     | cirazoline (10 μM)                                               | 30 min RT    | Scintillation counting | 27    |
| CysLT <sub>1</sub> (LTD <sub>4</sub> )<br>(h)<br>(agonist radioligand) | human recombinant (CHO cells)     | [ <sup>3</sup> H]LTD <sub>4</sub>             | 0.3 nM   | 0.24 nM  | LTD <sub>4</sub> (1 μM)                                          | 60 min RT    | Scintillation counting | 618   |
| MC <sub>4</sub> (h)<br>(agonist radioligand)                           | human recombinant (CHO cells)     | [ <sup>125</sup> I]NDP-α-MSH                  | 0.05 nM  | 0.54 nM  | NDP-α-MSH (1 μM)                                                 | 120 min 37°C | Scintillation counting | 211   |
| MT <sub>1</sub> (ML <sub>1A</sub> ) (h)<br>(agonist radioligand)       | human recombinant (CHO cells)     | [ <sup>125</sup> I]2-iodomelatonin            | 0.01 nM  | 0.04 nM  | melatonin (1 μM)                                                 | 240 min RT   | Scintillation counting | 639   |
| M (non-selective)<br>(antagonist radioligand)                          | rat cerebral cortex               | [ <sup>3</sup> H]QNB                          | 0.05 nM  | 0.01 nM  | atropine (1 μM)                                                  | 120 min RT   | Scintillation counting | 195   |
| NK <sub>1</sub> (h)<br>(agonist radioligand)                           | human endogenous (U373MG cells)   | [ <sup>125</sup> I]-Substance P LYS3          | 0.05 nM  | 0.04 nM  | [Sar <sup>6</sup> ,Met(O <sub>2</sub> ) <sup>1</sup> ]-SP (1 μM) | 30 min RT    | Scintillation counting | 104   |

**Table S2. Target binding conditions - continued**

| Assay                                               | Source                                 | Ligand                            | Conc.   | Kd       | Non Specific                              | Incubation  | Detection Method       | Bibl. |
|-----------------------------------------------------|----------------------------------------|-----------------------------------|---------|----------|-------------------------------------------|-------------|------------------------|-------|
| NK <sub>2</sub> (h)<br>(agonist radioligand)        | human recombinant (CHO cells)          | [ <sup>125</sup> I]NKA            | 0.1 nM  | 0.12 nM  | [Nleu <sup>10</sup> ]-NKA (4-10) (300 nM) | 60 min RT   | Scintillation counting | 3     |
| NK <sub>2</sub> (h)<br>(antagonist radioligand)     | human recombinant (CHO cells)          | [ <sup>3</sup> H]SR 142801        | 0.4 nM  | 0.47 nM  | SB 222200 (10 μM)                         | 120 min RT  | Scintillation counting | 741   |
| Y (non-selective)<br>(agonist radioligand)          | rat cerebral cortex                    | [ <sup>125</sup> I]peptide YY     | 0.05 nM | 0.1 nM   | NPY (1 μM)                                | 120 min RT  | Scintillation counting | 84    |
| N neuronal α4β2 (h)<br>(agonist radioligand)        | human recombinant (SH-SY5Y cells)      | [ <sup>3</sup> H]cytisine         | 0.6 nM  | 0.3 nM   | nicotine (10 μM)                          | 120 min 4°C | Scintillation counting | 1084  |
| opioid (non-selective)<br>(antagonist radioligand)  | rat cerebral cortex                    | [ <sup>3</sup> H]naloxone         | 1 nM    | 2.6 nM   | naloxone (1 μM)                           | 40 min RT   | Scintillation counting | 43    |
| NOP (ORL1) (h)<br>(agonist radioligand)             | human recombinant (Chem-1 (RBL) cells) | [ <sup>3</sup> H]nociceptin       | 0.06 nM | 0.054 nM | nociceptin (1 μM)                         | 60 min RT   | Scintillation counting | 1588  |
| PPAR <sub>γ</sub> (h)<br>(agonist radioligand)      | human recombinant (E. coli)            | [ <sup>3</sup> H]rosiglitazone    | 5 nM    | 5.7 nM   | rosiglitazone (10 μM)                     | 120 min 4°C | Scintillation counting | 567   |
| EP <sub>2</sub> (h)<br>(agonist radioligand)        | human recombinant (HEK-293 cells)      | [ <sup>3</sup> H]PGE <sub>2</sub> | 3 nM    | 3 nM     | PGE <sub>2</sub> (10 μM)                  | 120 min RT  | Scintillation counting | 781   |
| IP (PGI <sub>2</sub> ) (h)<br>(agonist radioligand) | human recombinant (HEK-293 cells)      | [ <sup>3</sup> H]iloprost         | 6 nM    | 8 nM     | iloprost (10 μM)                          | 60 min RT   | Scintillation counting | 781   |
| P2Y<br>(agonist radioligand)                        | rat cerebral cortex                    | [ <sup>35</sup> S]dATPαS          | 10 nM   | 10 nM    | dATPαS (10 μM)                            | 60 min RT   | Scintillation counting | 298   |
| sigma (non-selective) (h)<br>(agonist radioligand)  | human endogenous (Jurkat cells)        | [ <sup>3</sup> H]DTG              | 10 nM   | 41 nM    | Haloperidol (10 μM)                       | 120 min RT  | Scintillation counting | 1136  |
| GR (h)<br>(agonist radioligand)                     | human endogenous (IM-9 cells)          | [ <sup>3</sup> H]dexamethasone    | 1.5 nM  | 1.5 nM   | triamcinolone (10 μM)                     | 6 hr 4°C    | Scintillation counting | 283   |
| ER (non-selective) (h)<br>(agonist radioligand)     | human endogenous (MCF-7 cells)         | [ <sup>3</sup> H]estradiol        | 0.4 nM  | 0.2 nM   | 17-β-estradiol (6 μM)                     | 20 hr 4°C   | Scintillation counting | 1070  |
| PR (h)<br>(agonist radioligand)                     | human endogenous (T47D cells)          | [ <sup>3</sup> H]progesterone     | 0.5 nM  | 2 nM     | promegestone (1 μM)                       | 20 hr 4°C   | Scintillation counting | 930   |
| AR (h)<br>(agonist radioligand)                     | human endogenous (LNCaP cells)         | [ <sup>3</sup> H]methyltrienolone | 1 nM    | 0.8 nM   | testosterone (1 μM)                       | 24 hr 4°C   | Scintillation counting | 498   |
| TRH <sub>1</sub> (h)<br>(agonist radioligand)       | human recombinant (CHO cells)          | [ <sup>3</sup> H]Me-TRH           | 2 nM    | 3.9 nM   | TRH (10 μM)                               | 120 min 4°C | Scintillation counting | 709   |
| V <sub>1a</sub> (h)<br>(agonist radioligand)        | human recombinant (CHO cells)          | [ <sup>3</sup> H]AVP              | 0.3 nM  | 0.5 nM   | AVP (1 μM)                                | 60 min RT   | Scintillation counting | 343   |
| V <sub>2</sub> (h)<br>(agonist radioligand)         | human recombinant (CHO cells)          | [ <sup>3</sup> H]AVP              | 0.3 nM  | 0.76 nM  | AVP (1 μM)                                | 120 min RT  | Scintillation counting | 343   |

**Table S2. Target binding conditions - continued**

| Assay                                                                                    | Source              | Ligand                             | Conc.    | Kd       | Non Specific              | Incubation   | Detection Method       | Bibl.       |
|------------------------------------------------------------------------------------------|---------------------|------------------------------------|----------|----------|---------------------------|--------------|------------------------|-------------|
| Serotonin (5-Hydroxytryptamine) 5-HT1, Non-Selective                                     | rat cerebral cortex | [ <sup>3</sup> H] Serotonin (5-HT) | 1 nM     | 0.62 nM  | Serotonin (5-HT)(10.0 μM) | 60 min 25°C  | Scintillation counting | 1447 , 1567 |
| <b>Ion channels</b>                                                                      |                     |                                    |          |          |                           |              |                        |             |
| BZD (central) (agonist radioligand)                                                      | rat cerebral cortex | [ <sup>3</sup> H]flunitrazepam     | 0.4 nM   | 2.1 nM   | diazepam (3 μM)           | 60 min 4°C   | Scintillation counting | 227         |
| AMPA (agonist radioligand)                                                               | rat cerebral cortex | [ <sup>3</sup> H]AMPA              | 8 nM     | 82 nM    | L-glutamate (1 mM)        | 60 min 4°C   | Scintillation counting | 166         |
| kainate (agonist radioligand)                                                            | rat cerebral cortex | [ <sup>3</sup> H]kainic acid       | 5 nM     | 19 nM    | L-glutamate (1 mM)        | 60 min 4°C   | Scintillation counting | 160         |
| NMDA (antagonist radioligand)                                                            | rat cerebral cortex | [ <sup>3</sup> H]CGP 39653         | 5 nM     | 23 nM    | L-glutamate (100 μM)      | 60 min 4°C   | Scintillation counting | 221         |
| PCP (antagonist radioligand)                                                             | rat cerebral cortex | [ <sup>3</sup> H]TCP               | 10 nM    | 13 nM    | MK 801 (10 μM)            | 120 min 37°C | Scintillation counting | 257         |
| P2X (agonist radioligand)                                                                | rat urinary bladder | [ <sup>3</sup> H]α,β-MeATP         | 3 nM     | 2.6 nM   | α,β-MeATP (10 μM)         | 120 min 4°C  | Scintillation counting | 17          |
| Ca <sup>2+</sup> channel (L, dihydropyridine site) (antagonist radioligand)              | rat cerebral cortex | [ <sup>3</sup> H]nitrendipine      | 0.1 nM   | 0.18 nM  | nitrendipine (1 μM)       | 90 min RT    | Scintillation counting | 996         |
| Ca <sup>2+</sup> channel (L, diltiazem site) (benzothiazepines) (antagonist radioligand) | rat cerebral cortex | [ <sup>3</sup> H]diltiazem         | 15 nM    | 52 nM    | diltiazem (10 μM)         | 120 min RT   | Scintillation counting | 212         |
| Ca <sup>2+</sup> channel (L, verapamil site) (phenylalkylamine) (antagonist radioligand) | rat cerebral cortex | [ <sup>3</sup> H]D888              | 3 nM     | 3 nM     | D 600 (10 μM)             | 120 min RT   | Scintillation counting | 194         |
| K <sub>ATP</sub> channel (antagonist radioligand)                                        | rat cerebral cortex | [ <sup>3</sup> H]glibenclamide     | 0.1 nM   | 0.05 nM  | glibenclamide (1 μM)      | 60 min RT    | Scintillation counting | 6           |
| K <sub>v</sub> channel (antagonist radioligand)                                          | rat cerebral cortex | [ <sup>125</sup> I]α-dendrotoxin   | 0.01 nM  | 0.04 nM  | α-dendrotoxin (50 nM)     | 60 min RT    | Scintillation counting | 225         |
| SK <sub>Ca</sub> channel (antagonist radioligand)                                        | rat cerebral cortex | [ <sup>125</sup> I]apamin          | 0.007 nM | 0.007 nM | apamin (100 nM)           | 60 min 4°C   | Scintillation counting | 112         |
| Na <sup>+</sup> channel (site 2) (antagonist radioligand)                                | rat cerebral cortex | [ <sup>3</sup> H]batrachotoxin     | 10 nM    | 91 nM    | veratridine (300 μM)      | 60 min 37°C  | Scintillation counting | 28          |
| Cl <sup>-</sup> channel (GABA-gated) (antagonist radioligand)                            | rat cerebral cortex | [ <sup>35</sup> S]TBPS             | 3 nM     | 14.6 nM  | picrotoxinin (20 μM)      | 120 min RT   | Scintillation counting | 136         |

**Table S2. Target binding conditions - continued**

| Assay                                                   | Source                        | Ligand                                                         | Conc. | Kd      | Non Specific            | Incubation  | Detection Method       | Bibl. |
|---------------------------------------------------------|-------------------------------|----------------------------------------------------------------|-------|---------|-------------------------|-------------|------------------------|-------|
| <b>Transporters</b>                                     |                               |                                                                |       |         |                         |             |                        |       |
| norepinephrine transporter (h) (antagonist radioligand) | human recombinant (CHO cells) | [ <sup>3</sup> H]nisoxetine                                    | 1 nM  | 2.9 nM  | desipramine (1 μM)      | 120 min 4°C | Scintillation counting | 180   |
| dopamine transporter (h) (antagonist radioligand)       | human recombinant (CHO cells) | [ <sup>3</sup> H]BTCP                                          | 4 nM  | 4.5 nM  | BTCP (10 μM)            | 120 min 4°C | Scintillation counting | 190   |
| GABA transporter (antagonist radioligand)               | rat cerebral cortex           | [ <sup>3</sup> H]GABA (+ 10 μM isoguvacine) (+ 10 μM baclofen) | 10 nM | 4600 nM | GABA (1 mM)             | 30 min RT   | Scintillation counting | 214   |
| choline transporter (CHT1) (h) (antagonist radioligand) | human recombinant (CHO cells) | [ <sup>3</sup> H]hemicholinium-3                               | 3 nM  | 3.9 nM  | hemicholinium-3 (10 μM) | 60 min RT   | Scintillation counting | 648   |
| 5-HT transporter (h) (antagonist radioligand)           | human recombinant (CHO cells) | [ <sup>3</sup> H]imipramine                                    | 2 nM  | 1.7 nM  | imipramine (10 μM)      | 60 min RT   | Scintillation counting | 566   |

**Table S3. Target binding of compounds that are reference in Figure S2.**

| Compound I.D.                                                      | IC <sub>50</sub> (M) | K <sub>i</sub> (M) | nH  |
|--------------------------------------------------------------------|----------------------|--------------------|-----|
| <b>A<sub>1</sub> (h) (antagonist radioligand)</b>                  |                      |                    |     |
| DPCPX                                                              | 1.4E-09 M            | 8.7E-10 M          | 0.9 |
| <b>A<sub>2A</sub> (h) (agonist radioligand)</b>                    |                      |                    |     |
| NECA                                                               | 3.4E-08 M            | 2.8E-08 M          | 1.1 |
| <b>A<sub>2</sub> (h) (agonist radioligand)</b>                     |                      |                    |     |
| IB-MECA                                                            | 4.2E-10 M            | 2.5E-10 M          | 0.8 |
| <b>α<sub>1</sub> (non-selective) (antagonist radioligand)</b>      |                      |                    |     |
| prazosin                                                           | 3.0E-10 M            | 7.9E-11 M          | 0.8 |
| <b>α<sub>2</sub> (non-selective) (antagonist radioligand)</b>      |                      |                    |     |
| yohimbine                                                          | 1.0E-07 M            | 4.1E-08 M          | 0.9 |
| <b>β<sub>1</sub> (h) (agonist radioligand)</b>                     |                      |                    |     |
| atenolol                                                           | 4.1E-07 M            | 2.3E-07 M          | 0.9 |
| <b>β<sub>2</sub> (h) (antagonist radioligand)</b>                  |                      |                    |     |
| ICI 118551                                                         | 8.1E-10 M            | 2.7E-10 M          | 1.7 |
| <b>AT<sub>1</sub> (h) (antagonist radioligand)</b>                 |                      |                    |     |
| saralasin                                                          | 9.4E-10 M            | 4.7E-10 M          | 0.8 |
| saralasin                                                          | 1.1E-09 M            | 5.5E-10 M          | 1.0 |
| <b>AT<sub>2</sub> (h) (agonist radioligand)</b>                    |                      |                    |     |
| angiotensin-III                                                    | 6.3E-11 M            | 3.2E-11 M          | 1.0 |
| <b>BZD (central) (agonist radioligand)</b>                         |                      |                    |     |
| diazepam                                                           | 9.9E-09 M            | 8.3E-09 M          | 0.9 |
| <b>B<sub>1</sub> (h) (agonist radioligand)</b>                     |                      |                    |     |
| desArg <sup>10</sup> -KD                                           | 8.5E-10 M            | 4.3E-10 M          | 1.0 |
| <b>B<sub>2</sub> (h) (agonist radioligand)</b>                     |                      |                    |     |
| NPC 567                                                            | 8.2E-09 M            | 4.2E-09 M          | 0.6 |
| <b>CB<sub>1</sub> (h) (agonist radioligand)</b>                    |                      |                    |     |
| CP 55940                                                           | 9.9E-10 M            | 8.7E-10 M          | 0.9 |
| <b>CB<sub>2</sub> (h) (agonist radioligand)</b>                    |                      |                    |     |
| WIN 55212-2                                                        | 2.0E-09 M            | 1.3E-09 M          | 0.8 |
| <b>CCK<sub>1</sub> (CCK<sub>A</sub>) (h) (agonist radioligand)</b> |                      |                    |     |
| CCK-8s                                                             | 9.1E-11 M            | 6.8E-11 M          | 1.2 |
| <b>CCK<sub>2</sub> (CCK<sub>B</sub>) (h) (agonist radioligand)</b> |                      |                    |     |
| CCK-8s                                                             | 2.0E-10 M            | 8.2E-11 M          | 0.9 |
| <b>CRF<sub>4</sub> (h) (agonist radioligand)</b>                   |                      |                    |     |
| sauvagine                                                          | 8.4E-10 M            | 5.2E-10 M          | 0.7 |
| <b>D<sub>1</sub> (h) (antagonist radioligand)</b>                  |                      |                    |     |
| SCH 23390                                                          | 3.8E-10 M            | 1.5E-10 M          | 1.0 |
| <b>D<sub>2S</sub> (h) (antagonist radioligand)</b>                 |                      |                    |     |
| (+)-butaclamol                                                     | 2.7E-09 M            | 9.1E-10 M          | 1.2 |
| <b>D<sub>3</sub> (h) (antagonist radioligand)</b>                  |                      |                    |     |
| (+)-butaclamol                                                     | 3.0E-09 M            | 6.6E-10 M          | 0.8 |
| (+)-butaclamol                                                     | 1.9E-09 M            | 4.2E-10 M          | 1.3 |
| <b>D<sub>4.4</sub> (h) (antagonist radioligand)</b>                |                      |                    |     |
| clozapine                                                          | 7.1E-08 M            | 2.8E-08 M          | 1.3 |
| <b>ET<sub>A</sub> (h) (agonist radioligand)</b>                    |                      |                    |     |
| endothelin-1                                                       | 8.6E-11 M            | 4.3E-11 M          | 0.9 |
| <b>ET<sub>B</sub> (h) (agonist radioligand)</b>                    |                      |                    |     |
| endothelin-3                                                       | 8.4E-11 M            | 4.8E-11 M          | 1.2 |
| <b>GABA (non-selective) (agonist radioligand)</b>                  |                      |                    |     |
| GABA                                                               | 3.6E-08 M            | 2.2E-08 M          | 1.2 |

**Table S3. Target binding of compounds that are reference in Figure S2 – continued.**

| Compound I.D.                                                        | IC <sub>50</sub> (M) | K <sub>i</sub> (M) | nH  |
|----------------------------------------------------------------------|----------------------|--------------------|-----|
| <b>AMPA (agonist radioligand)</b>                                    |                      |                    |     |
| L-glutamate                                                          | 1.4E-07 M            | 1.2E-07 M          | 2.4 |
| L-glutamate                                                          | 2.7E-07 M            | 2.5E-07 M          | 0.8 |
| <b>kainate (agonist radioligand)</b>                                 |                      |                    |     |
| kainic acid                                                          | 2.7E-08 M            | 2.1E-08 M          | 0.6 |
| <b>NMDA (antagonist radioligand)</b>                                 |                      |                    |     |
| CGS 19755                                                            | 4.7E-07 M            | 3.8E-07 M          | 1.1 |
| <b>H<sub>1</sub> (h) (antagonist radioligand)</b>                    |                      |                    |     |
| pyrilamine                                                           | 2.9E-09 M            | 1.8E-09 M          | 1.5 |
| <b>H<sub>2</sub> (h) (antagonist radioligand)</b>                    |                      |                    |     |
| cimetidine                                                           | 7.7E-07 M            | 7.5E-07 M          | 1.5 |
| cimetidine                                                           | 6.9E-07 M            | 6.7E-07 M          | 1.1 |
| <b>H<sub>3</sub> (h) (agonist radioligand)</b>                       |                      |                    |     |
| (R)-α-Me-histamine                                                   | 1.4E-09 M            | 3.3E-10 M          | 1.2 |
| <b>I<sub>2</sub> (antagonist radioligand)</b>                        |                      |                    |     |
| idazoxan                                                             | 8.8E-09 M            | 5.9E-09 M          | 1.0 |
| <b>CysLT<sub>1</sub> (LTD<sub>4</sub>) (h) (agonist radioligand)</b> |                      |                    |     |
| LTD <sub>4</sub>                                                     | 6.5E-10 M            | 2.9E-10 M          | 1.1 |
| <b>MC<sub>4</sub> (h) (agonist radioligand)</b>                      |                      |                    |     |
| NOP-α-MSH                                                            | 3.0E-10 M            | 2.7E-10 M          | 1.2 |
| <b>MT<sub>1</sub> (ML<sub>1A</sub>) (h) (agonist radioligand)</b>    |                      |                    |     |
| melatonin                                                            | 1.7E-10 M            | 1.4E-10 M          | 1.1 |
| <b>M (non-selective) (antagonist radioligand)</b>                    |                      |                    |     |
| atropine                                                             | 3.9E-10 M            | 6.6E-11 M          | 0.9 |
| <b>NK<sub>1</sub> (h) (agonist radioligand)</b>                      |                      |                    |     |
| [Sar <sup>8</sup> ,Met(O <sub>2</sub> ) <sup>11</sup> ]-SP           | 4.5E-10 M            | 2.0E-10 M          | 0.6 |
| <b>NK<sub>2</sub> (h) (agonist radioligand)</b>                      |                      |                    |     |
| [Nleu <sup>10</sup> ]-NKA (4-10)                                     | 3.3E-09 M            | 1.8E-09 M          | 0.7 |
| <b>NK<sub>3</sub> (h) (antagonist radioligand)</b>                   |                      |                    |     |
| SB 222200                                                            | 7.4E-09 M            | 4.0E-09 M          | 1.1 |
| <b>Y (non-selective) (agonist radioligand)</b>                       |                      |                    |     |
| NPY                                                                  | 4.5E-10 M            | 3.0E-10 M          | 1.2 |
| <b>N neuronal α4β2 (h) (agonist radioligand)</b>                     |                      |                    |     |
| nicotine                                                             | 7.5E-09 M            | 2.5E-09 M          | 0.7 |
| <b>opioid (non-selective) (antagonist radioligand)</b>               |                      |                    |     |
| naloxone                                                             | 1.9E-09 M            | 1.4E-09 M          | 0.8 |
| <b>NOP (ORL1) (h) (agonist radioligand)</b>                          |                      |                    |     |
| nociceptin                                                           | 1.5E-10 M            | 6.9E-11 M          | 1.3 |
| <b>PPARγ (h) (agonist radioligand)</b>                               |                      |                    |     |
| rosiglitazone                                                        | 2.0E-08 M            | 1.1E-08 M          | 1.3 |
| rosiglitazone                                                        | 1.8E-08 M            | 9.6E-09 M          | 0.9 |
| <b>PCP (antagonist radioligand)</b>                                  |                      |                    |     |
| MK 801                                                               | 9.2E-09 M            | 5.2E-09 M          | 0.9 |
| <b>EP<sub>2</sub> (h) (agonist radioligand)</b>                      |                      |                    |     |
| PGE <sub>2</sub>                                                     | 1.9E-09 M            | 9.6E-10 M          | 1.1 |
| <b>IP (PGL<sub>2</sub>) (h) (agonist radioligand)</b>                |                      |                    |     |
| iloprost                                                             | 2.4E-08 M            | 1.4E-08 M          | 0.8 |
| <b>P2X (agonist radioligand)</b>                                     |                      |                    |     |
| α,β-MeATP                                                            | 4.4E-09 M            | 2.1E-09 M          | 0.8 |
| <b>P2Y (agonist radioligand)</b>                                     |                      |                    |     |
| dATPαS                                                               | 9.6E-08 M            | 4.8E-08 M          | 0.9 |
| <b>sigma (non-selective) (h) (agonist radioligand)</b>               |                      |                    |     |
| haloperidol                                                          | 7.0E-08 M            | 5.7E-08 M          | 2.2 |

**Table S3. Target binding of compounds that are reference in Figure S2 – further continued**

| Compound I.D.                                                                                  | IC <sub>50</sub> (M) | K <sub>i</sub> (M) | nH  |
|------------------------------------------------------------------------------------------------|----------------------|--------------------|-----|
| <b>GR (h) (agonist radioligand)</b>                                                            |                      |                    |     |
| dexamethasone                                                                                  | 3.4E-09 M            | 1.7E-09 M          | 1.1 |
| <b>ER (non-selective) (h) (agonist radioligand)</b>                                            |                      |                    |     |
| 17-β-estradiol                                                                                 | 4.7E-10 M            | 1.6E-10 M          | 1.0 |
| <b>PR (h) (agonist radioligand)</b>                                                            |                      |                    |     |
| promegestone                                                                                   | 6.9E-10 M            | 5.5E-10 M          | 1.6 |
| promegestone                                                                                   | 2.9E-10 M            | 2.4E-10 M          | 1.3 |
| <b>AR (h) (agonist radioligand)</b>                                                            |                      |                    |     |
| testosterone                                                                                   | 3.0E-09 M            | 1.3E-09 M          | 0.8 |
| <b>TRH<sub>1</sub> (h) (agonist radioligand)</b>                                               |                      |                    |     |
| TRH                                                                                            | 3.7E-08 M            | 2.5E-08 M          | 0.9 |
| <b>V<sub>1a</sub> (h) (agonist radioligand)</b>                                                |                      |                    |     |
| [d(CH <sub>2</sub> ) <sub>5</sub> <sup>1</sup> Tyr(Me) <sub>2</sub> ]-AVP                      | 2.1E-09 M            | 1.3E-09 M          | 1.2 |
| <b>V<sub>2</sub> (h) (agonist radioligand)</b>                                                 |                      |                    |     |
| AVP                                                                                            | 1.8E-09 M            | 1.3E-09 M          | 1.0 |
| <b>Ca<sup>2+</sup> channel (L, dihydropyridine site) (antagonist radioligand)</b>              |                      |                    |     |
| nitrendipine                                                                                   | 2.6E-10 M            | 1.7E-10 M          | 1.3 |
| <b>Ca<sup>2+</sup> channel (L, diltiazem site) (benzothiazepines) (antagonist radioligand)</b> |                      |                    |     |
| diltiazem                                                                                      | 4.8E-08 M            | 3.7E-08 M          | 0.5 |
| diltiazem                                                                                      | 5.3E-08 M            | 4.1E-08 M          | 1.3 |
| <b>Ca<sup>2+</sup> channel (L, verapamil site) (phenylalkylamine) (antagonist radioligand)</b> |                      |                    |     |
| D 600                                                                                          | 1.9E-08 M            | 9.6E-09 M          | 0.6 |
| <b>K<sub>ATP</sub> channel (antagonist radioligand)</b>                                        |                      |                    |     |
| glibenclamide                                                                                  | 1.0E-10 M            | 3.5E-11 M          | 0.7 |
| <b>K<sub>V</sub> channel (antagonist radioligand)</b>                                          |                      |                    |     |
| α-dendrotoxin                                                                                  | 3.0E-10 M            | 2.4E-10 M          | >3  |
| <b>SK<sub>Ca</sub> channel (antagonist radioligand)</b>                                        |                      |                    |     |
| apamin                                                                                         | 2.5E-11 M            | 1.3E-11 M          | 1.5 |
| <b>Na<sup>+</sup> channel (site 2) (antagonist radioligand)</b>                                |                      |                    |     |
| veratridine                                                                                    | 2.2E-05 M            | 2.0E-05 M          | 1.5 |
| <b>Cl<sup>-</sup> channel (GABA-gated) (antagonist radioligand)</b>                            |                      |                    |     |
| picrotoxinin                                                                                   | 3.3E-07 M            | 2.8E-07 M          | 0.8 |
| <b>norepinephrine transporter (h) (antagonist radioligand)</b>                                 |                      |                    |     |
| protriptyline                                                                                  | 5.4E-09 M            | 4.0E-09 M          | 1.2 |
| <b>dopamine transporter (h) (antagonist radioligand)</b>                                       |                      |                    |     |
| BTCP                                                                                           | 9.7E-09 M            | 5.1E-09 M          | 2.1 |
| <b>GABA transporter (antagonist radioligand)</b>                                               |                      |                    |     |
| nipecotic acid                                                                                 | 2.4E-06 M            | 2.4E-06 M          | 0.7 |
| <b>choline transporter (CHT1) (h) (antagonist radioligand)</b>                                 |                      |                    |     |
| hemicholinium-3                                                                                | 1.8E-08 M            | 1.0E-08 M          | 0.8 |
| <b>5-HT transporter (h) (antagonist radioligand)</b>                                           |                      |                    |     |
| imipramine                                                                                     | 2.5E-09 M            | 1.1E-09 M          | 0.9 |
| <b>Serotonin (5-Hydroxytryptamine) 5-HT<sub>1</sub>, Non-Selective</b>                         |                      |                    |     |
| Serotonin (5-HT)                                                                               | 2.6E-09 M            | 1.0E-09 M          | 0.9 |



**Table S4. Conditions of enzyme and uptake assays.**

| Assay                                                  | Source                                     | Substrate/<br>Stimulus/Tracer                                        | Incubation     | Measured<br>Component         | Detection Method       | Bibl. |
|--------------------------------------------------------|--------------------------------------------|----------------------------------------------------------------------|----------------|-------------------------------|------------------------|-------|
| <b>Epigenetic enzymes and DNA-related enzymes</b>      |                                            |                                                                      |                |                               |                        |       |
| <b>CENP-E (h)</b>                                      | human recombinant<br>( <i>E. coli</i> )    | ATP<br>(100 $\mu$ M)                                                 | 5 min<br>RT    | inorganic phosphate           | Photometry             | 853   |
| <b>Eg5 (h)</b>                                         | human recombinant                          | ATP<br>(50 $\mu$ M)                                                  | 10 min<br>RT   | inorganic phosphate           | Photometry             | 853   |
| <b>HDAC3 (h)</b>                                       | human recombinant                          | fluorogenic HDAC<br>substrate<br>(50 $\mu$ M)                        | 10 min<br>RT   | fluoro-lysine                 | Fluorimetry            | 896   |
| <b>HDAC4 (h)</b>                                       | human recombinant                          | fluorogenic HDAC<br>substrate class 2a<br>(20 $\mu$ M)               | 30 min<br>RT   | fluoro-lysine                 | Fluorimetry            | 896   |
| <b>HDAC6 (h)</b>                                       | human recombinant                          | fluorogenic HDAC<br>substrate<br>(25 $\mu$ M)                        | 30 min<br>RT   | fluoro-lysine                 | Fluorimetry            | 896   |
| <b>HDAC11 (h)</b>                                      | human recombinant                          | fluorogenic HDAC<br>substrate class 2a<br>(50 $\mu$ M)               | 30 min<br>37°C | fluoro-lysine                 | Fluorimetry            | 896   |
| <b>sirtuin 1 (h)<br/>(inhibitor effect)</b>            | human recombinant<br>( <i>E. coli</i> )    | fluorogenic HDAC<br>substrate<br>(200 $\mu$ M)                       | 20 min<br>RT   | fluoro-lysine                 | Fluorimetry            | 976   |
| <b>sirtuin 2 (h)<br/>(inhibitor effect)</b>            | human recombinant<br>( <i>E. coli</i> )    | fluoro-lysine sirtuin 2<br>deacetylase<br>substrate<br>(150 $\mu$ M) | 60 min<br>RT   | fluoro-lysine                 | Fluorimetry            | 976   |
| <b>Other enzymes</b>                                   |                                            |                                                                      |                |                               |                        |       |
| <b>COX1(h)</b>                                         | human recombinant                          | Arachidonic acid<br>(3 $\mu$ M) + ADHP ( 25<br>$\mu$ M)              | 3 min<br>RT    | Resorufin (oxdyzed<br>ADHP)   | Fluorimetry            | 1480  |
| <b>5-lipoxygenase (h)</b>                              | human recombinant<br>(Sf9 cells) (cytosol) | arachidonic acid<br>(25 $\mu$ M)                                     | 20 min<br>RT   | rhodamine 123                 | Fluorimetry            | 1068  |
| <b>PDE1B (h)</b>                                       | human recombinant<br>(Sf9 cells)           | [3H]cGMP + cGMP<br>(1.5 $\mu$ M)                                     | 20 min<br>RT   | [3H]5GMP                      | Scintillation counting | 1399  |
| <b>PDE2A1 (h)</b>                                      | human recombinant<br>(Sf9 cells)           | [3H]cAMP + cAMP<br>(2 $\mu$ M)                                       | 20 min<br>RT   | [3H]5AMP                      | Scintillation counting | 1399  |
| <b>PDE3A (h)</b>                                       | human recombinant<br>(Sf9 cells)           | [3H]cAMP + cAMP<br>(0.5 $\mu$ M)                                     | 20 min<br>RT   | [3H]5AMP                      | Scintillation counting | 1399  |
| <b>PDE4D2 (h)</b>                                      | human recombinant<br>(Sf9 cells)           | [3H]cAMP + cAMP<br>(0.5 $\mu$ M)                                     | 20 min<br>RT   | [3H]5AMP                      | Scintillation counting | 1399  |
| <b>PDE5 (h)<br/>(non-selective)</b>                    | human platelets                            | [ <sup>3</sup> H]cGMP<br>+ cGMP (1 $\mu$ M)                          | 60 min<br>RT   | [ <sup>3</sup> H]5GMP         | Scintillation counting | 263   |
| <b>adenylyl cyclase<br/>(activator effect)</b>         | CHO cells                                  | none<br>(100 $\mu$ M forskolin<br>for control)                       | 10 min<br>RT   | cAMP                          | HTRF                   | 1109  |
| <b>guanylyl cyclase<br/>(h) (activator<br/>effect)</b> | human recombinant                          | GTP<br>(10 $\mu$ M)<br>(100 $\mu$ M SNP<br>for control)              | 10 min<br>RT   | cGMP                          | HTRF                   | 1076  |
| <b>phosphatase 1B (h)<br/>(PTP1B)</b>                  | human recombinant<br>( <i>E. coli</i> )    | DIFMUP<br>(10 $\mu$ M)                                               | 30 min<br>RT   | DIFMU                         | Fluorimetry            | 928   |
| <b>phosphatase<br/>CDC25A (h)</b>                      | human recombinant<br>( <i>E. coli</i> )    | DIFMUP<br>(200 $\mu$ M)                                              | 20 min<br>RT   | DIFMU                         | Fluorimetry            | 928   |
| <b>acetylcholinesterase<br/>(h)</b>                    | human recombinant<br>(HEK-293 cells)       | Acetylthiocholine<br>(400 $\mu$ M)                                   | 30 min<br>RT   | 5 thio 2 nitrobenzoic<br>acid | Photometry             | 63    |
| <b>GABA<br/>transaminase</b>                           | rat brain                                  | GABA (9 mM)<br>+ $\alpha$ -ketoglutarate (9<br>mM)                   | 60 min<br>37°C | succinic<br>semialdehyde      | Fluorimetry            | 286   |
| <b>MAO-A (h)</b>                                       | human placenta                             | kynuramine<br>(0.15 mM)                                              | 20 min<br>RT   | 4-OHquinoline                 | Photometry             | 265   |

| Assay                                        | Source                     | Substrate/<br>Stimulus/Tracer             | Incubation     | Measured<br>Component             | Detection Method       | Bibl. |
|----------------------------------------------|----------------------------|-------------------------------------------|----------------|-----------------------------------|------------------------|-------|
| <b>MAO-B (h)<br/>recombinant<br/>enzyme</b>  | human recombinant          | D-Luciferin<br>derivative<br>(4 $\mu$ M)  | 60 min<br>37°C | methyl ester luciferin            | Luminescence           | 1134  |
| <b>tyrosine<br/>hydroxylase</b>              | rat striatum               | [ <sup>3</sup> H]tyrosine<br>(10 $\mu$ M) | 20 min<br>37°C | [ <sup>3</sup> H]H <sub>2</sub> O | Scintillation counting | 168   |
| <b>ATPase (Na<sup>+</sup>/K<sup>+</sup>)</b> | porcine cerebral<br>cortex | ATP<br>(2 mM)                             | 60 min<br>37°C | PI                                | Photometry             | 71    |
